# Supplementary material for: Clinical significance of high-dose cytarabine added to cyclophosphamide/total-body irradiation in bone marrow or peripheral blood stem cell transplantation for myeloid malignancy
Source: PubMed Central journal article supplement (PMC4559384; doi:10.1186/s13045-015-0201-x), 2015-09-04
Supplement: 13045_2015_201_MOESM1_ESM.pdf [file 13045_2015_201_MOESM1_ESM.pdf]

**Supplemental Figure 1**

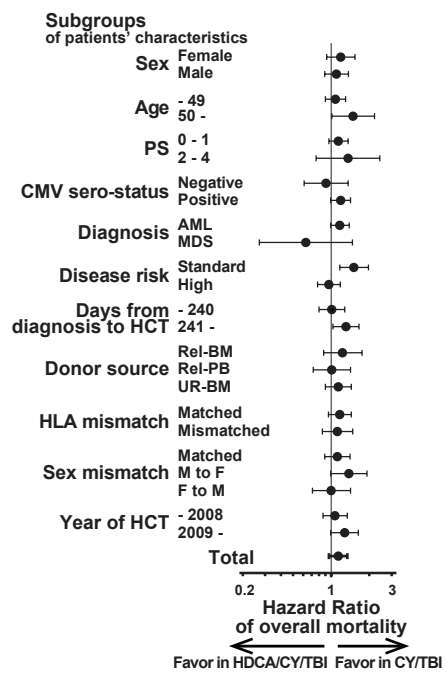

**Subgroup analyses of OS with respect to patient characteristics**  
 OS was compared in each subgroup with respect to patient characteristics. The adjusted HRs of overall mortality in the HDCA/CY/TBI group were shown compared to the CY/TBI group. Black dots indicate HRs, and 95%CI ranges are shown by black bars.
